# Supplementary material
Source: MDPI journal article supplement (https://www.mdpi.com/2073-4441/11/9/1854)
Supplement: s1 [file s1]

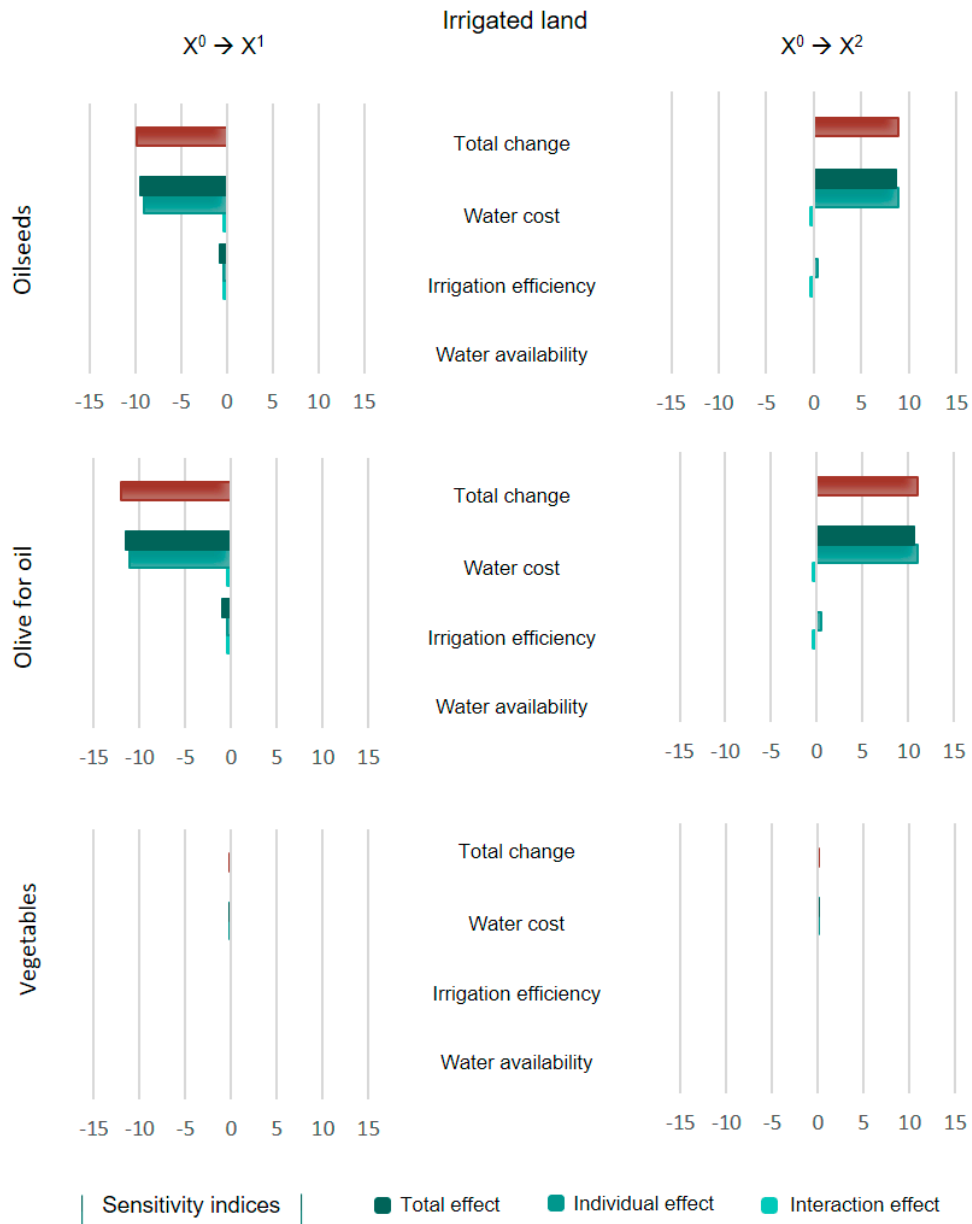

**Figure S1.** Sensitivity of irrigated agricultural land (oilseeds, olive for oil and vegetables) to scenario drivers when shifting from the reference to the worst-case scenario (**left**) and to the best-case scenario (**right**). The total change in irrigated land is decomposed in changes due to total, individual and interaction effects of each driver. The results are presented as % change from the reference scenario.

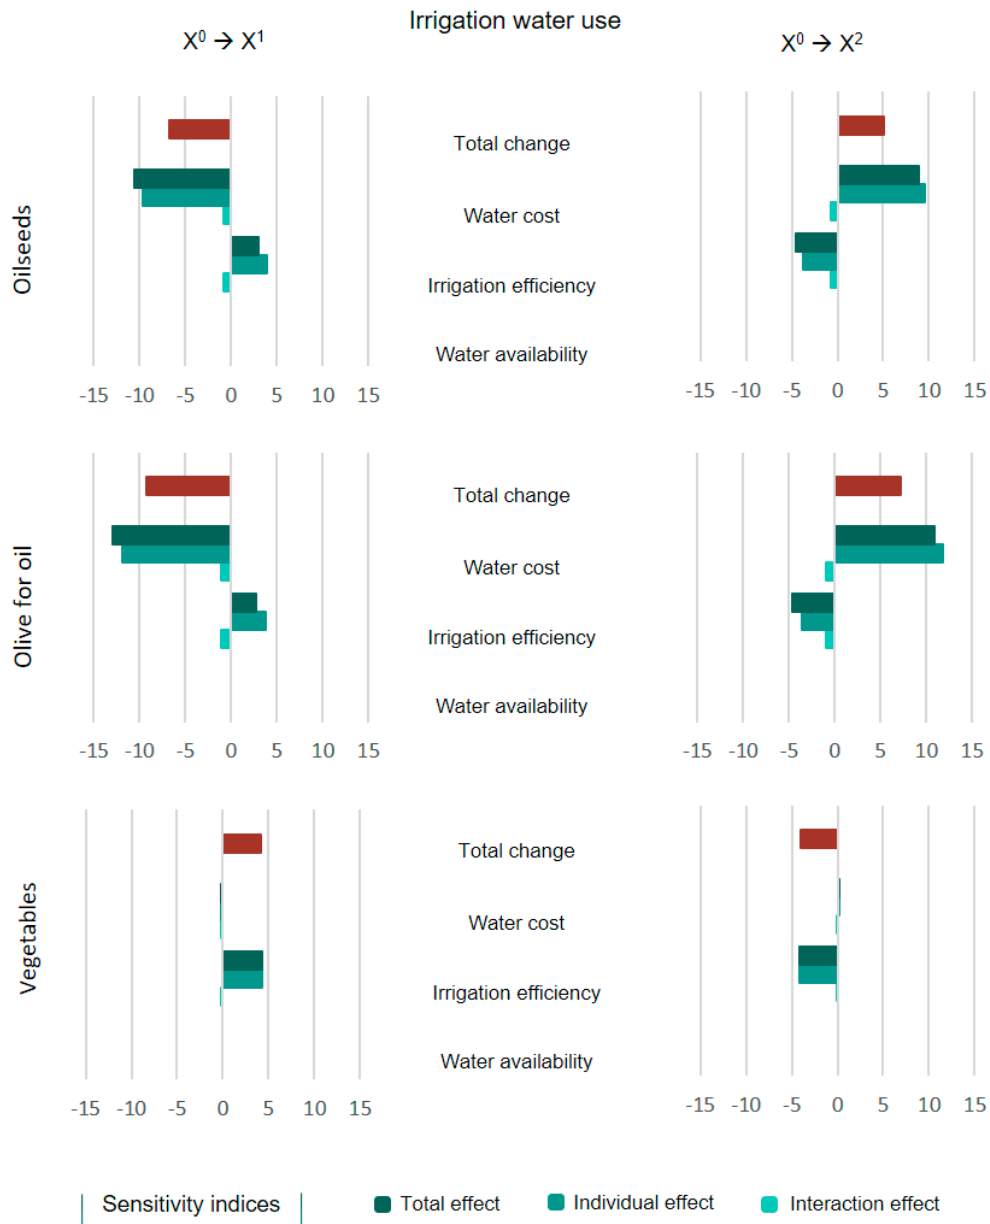

**Figure S2.** Sensitivity of irrigation water use (oilseeds, olive for oil and vegetables) to scenario drivers when shifting from the reference to the worst-case scenario (**left**) and to the best-case scenario (**right**). The total change in irrigation water use is decomposed in changes due to total, individual and interaction effects of each driver. The results are presented as % change from the reference scenario.

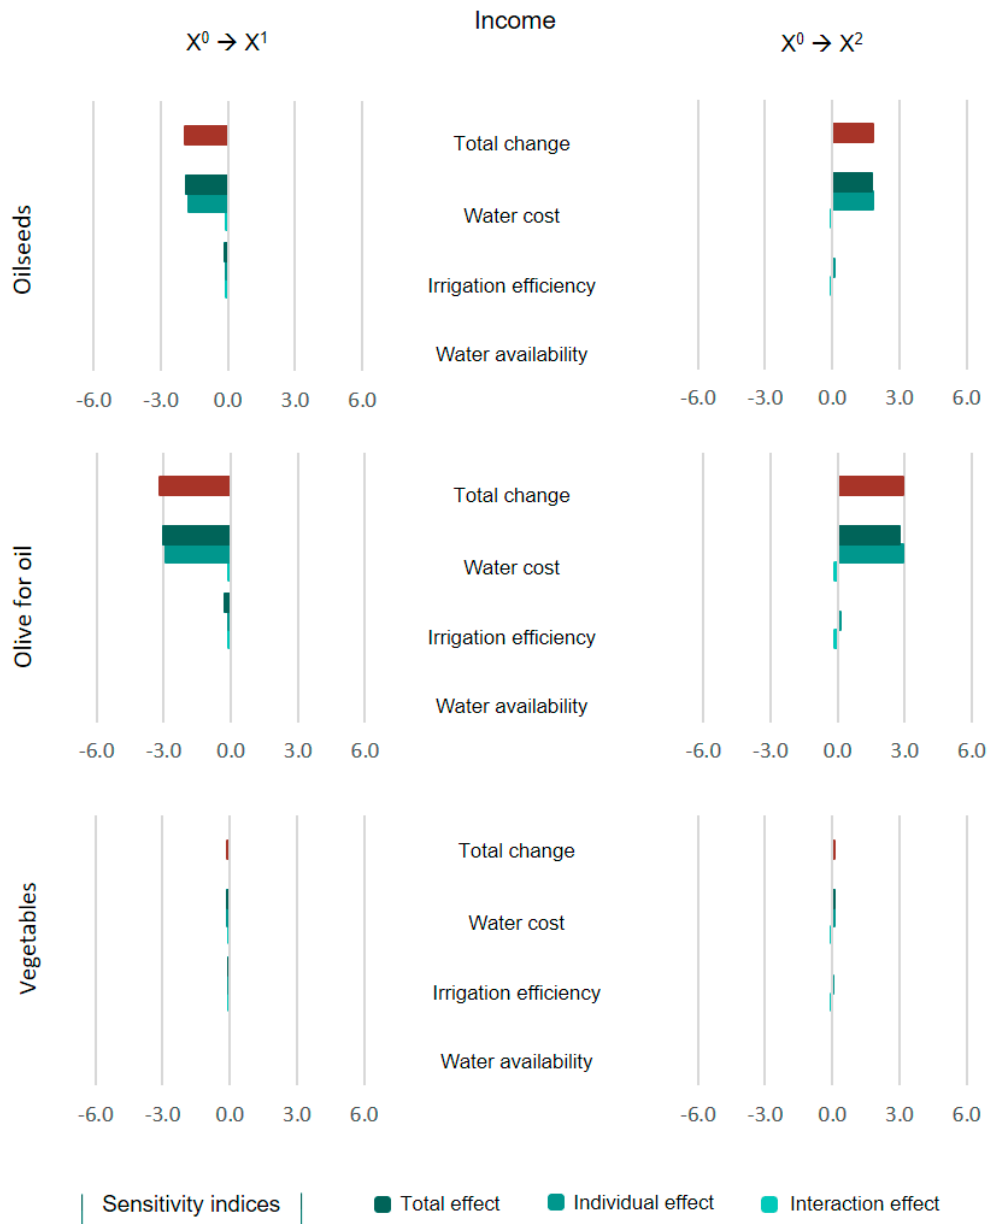

**Figure S3.** Sensitivity of income (oilseeds, olive for oil and vegetables) to scenario drivers when shifting from the reference to the worst-case scenario (**left**) and to the best-case scenario (**right**). The total change in income is decomposed in changes due to total, individual and interaction effects of each driver. The results are presented as % change from reference scenario.
